# Supplementary material
Source: PubMed Central journal article supplement (PMC2782609)
Supplement: NIHMS150391-supplement-Table_S1-S2_FigS1.pdf [file NIHMS150391-supplement-Table_S1-S2_FigS1.pdf]

**Supplemental Material**

| Regions (activation)                           | T&T Coordinates |     |     |     |
|------------------------------------------------|-----------------|-----|-----|-----|
|                                                | Z-score         | x   | y   | z   |
| Locus ceruleus, right                          | 3.38            | 11  | -26 | -20 |
| Posterior cingulate/Precuneus, midline         | 3.99            | -1  | -55 | 15  |
| Posterior cingulate/Precuneus, right           | 3.13            | 22  | -56 | 9   |
| Posterior cingulate/Precuneus, right           | 3.35            | 14  | -48 | 22  |
| Posterior cingulate/Precuneus, right           | 3.21            | 24  | -53 | 20  |
| Posterior cingulate, right                     | 3.14            | 3   | -37 | 3   |
| Inferior Temporal gyrus, right                 | 4.33            | 52  | -58 | -20 |
| Cerebellum, right                              | 4.22            | 3   | -79 | -23 |
| Cerebellum, left                               | 4.46            | -18 | -77 | -25 |
| Occipital cortex, right lateral, inferior div. | 4.24            | 48  | -68 | -17 |
| Occipital pole, left                           | 4.14            | -31 | -87 | -17 |
| Occipital cortex, inferior div, left           | 4.11            | -35 | -85 | -7  |

Wholebrain analysis, voxel threshold  $p < .01$ , cluster threshold  $p < .05$ , corrected. Local maxima reported. Region labels adapted from Harvard-Oxford Cortical and Subcortical Structural Atlases, and Juelich Histological Atlas in FSLView 3.0

**Figure S1: Attention and grief style**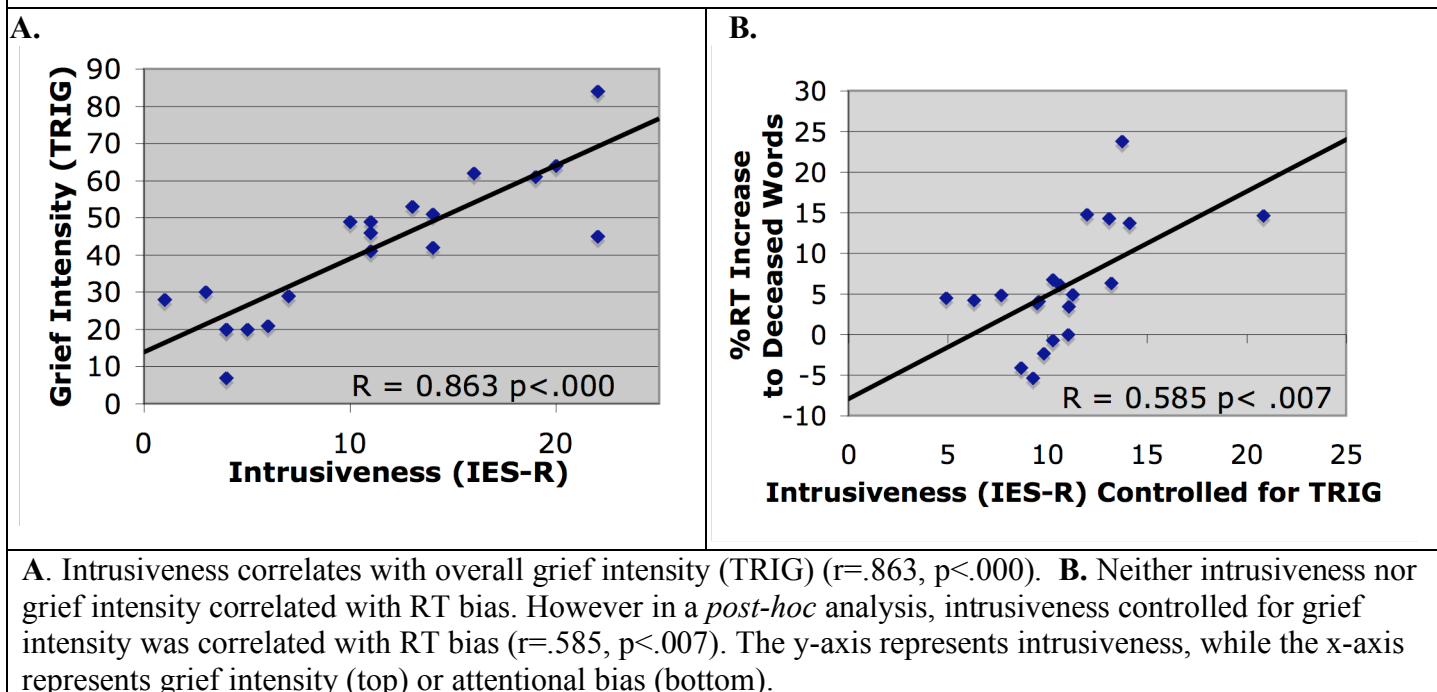

| <b>Table S2: Functional connectivity during neutral versus affect blocks</b>                                                                                                                                                                                                                                                                                                                          |                                       |                 |               |                |                |
|-------------------------------------------------------------------------------------------------------------------------------------------------------------------------------------------------------------------------------------------------------------------------------------------------------------------------------------------------------------------------------------------------------|---------------------------------------|-----------------|---------------|----------------|----------------|
| <b>Block</b>                                                                                                                                                                                                                                                                                                                                                                                          | <b>Functionally Connected Regions</b> | <b>Mean (r)</b> | <b>SD (r)</b> | <b>Min (r)</b> | <b>Max (r)</b> |
| <b>Neutral Blocks</b>                                                                                                                                                                                                                                                                                                                                                                                 | DLPFC-Left Amygdala                   | 0.319           | 0.242         | -0.136         | 0.723          |
|                                                                                                                                                                                                                                                                                                                                                                                                       | DLPFC-Right Amygdala                  | 0.267           | 0.237         | -0.168         | 0.650          |
|                                                                                                                                                                                                                                                                                                                                                                                                       | rACC-Left Amygdala                    | 0.151           | 0.342         | -0.677         | 0.647          |
|                                                                                                                                                                                                                                                                                                                                                                                                       | rACC-Right Amygdala                   | 0.128           | 0.328         | -0.629         | 0.605          |
| <b>Affect Blocks</b>                                                                                                                                                                                                                                                                                                                                                                                  | DLPFC-Left Amygdala                   | 0.306           | 0.278         | -0.250         | 0.728          |
|                                                                                                                                                                                                                                                                                                                                                                                                       | DLPFC-Right Amygdala                  | 0.325           | 0.251         | -0.262         | 0.698          |
|                                                                                                                                                                                                                                                                                                                                                                                                       | rACC-Left Amygdala                    | 0.191           | 0.359         | -0.503         | 0.773          |
|                                                                                                                                                                                                                                                                                                                                                                                                       | rACC-Right Amygdala                   | 0.192           | 0.373         | -0.603         | 0.800          |
| Functional connectivity between control regions and amygdala during neutral versus affective word blocks, calculated as the r coefficient of the two time series. Connectivity was calculated by removing motion parameters as nuisance variables, extracting time series for the regions of interest as determined by activation maps, and then calculating connectivity during the two block types. |                                       |                 |               |                |                |
